# Supplementary material
Source: Springer Nature journal article supplement (https://www.springermedizin.de/resource/supplementary/12974_2012_680_MOESM3_ESM.pdf/9601802)
Supplement: MOESM3 [file 9601802]

Additional File 3

Schmitt C, et al: Brain leukocyte infiltration initiated by peripheral inflammation or EAE occurs through pathways connected to the CSF-filled compartments of the forebrain and midbrain.

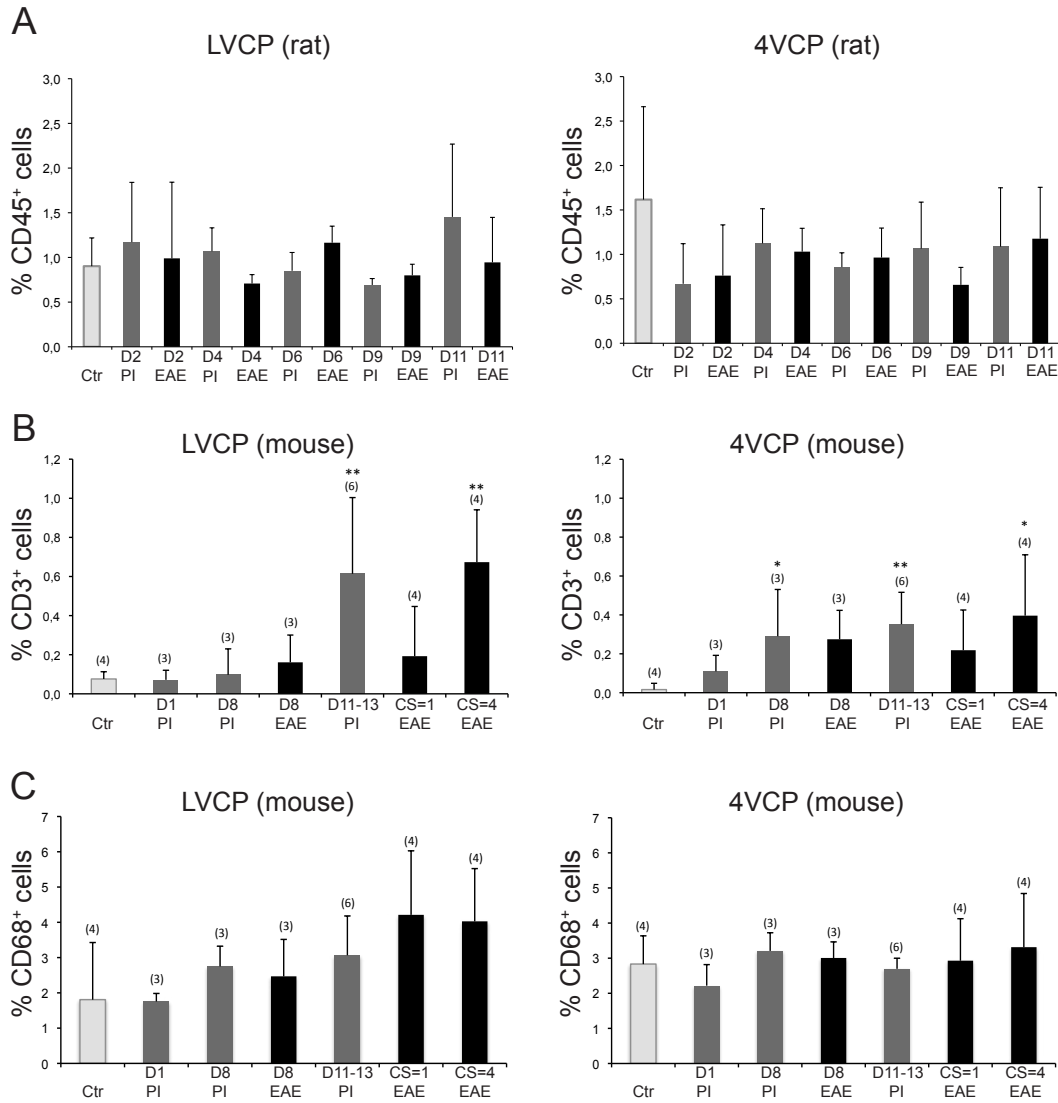

Quantification of immune cells associated with choroid plexuses in control, PI and EAE-diseased animals. A. CD45<sup>+</sup> cells associated with lateral (left panel) and fourth (right panel) CP in rat. Data represent mean  $\pm$  SD, with n=3. B-C. CD3<sup>+</sup> and CD68<sup>+</sup> cells associated with lateral (left panels) and fourth (right panels) CP respectively, in mice. Ctr: Control, PI: Peripherally inflamed, CS=1: clinical score of 1, CS=4: clinical score of 4, (n). \*p < 0.05; \*\*p < 0.01, statistically different from value in control animals, Dunnett's test.
